# Supplementary material
Source: Springer Nature journal article supplement (https://www.springerprofessional.de/resource/supplementary/13638_2013_845_MOESM2_ESM.pdf/11898600)

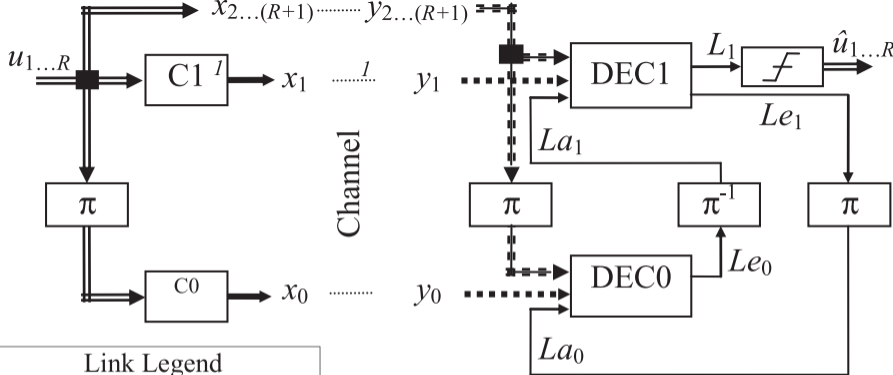

### Link Legend

-   $R$  symbols
-   $S \cdot R$  soft values
-  one symbol
-   $S$  soft values
-   $2^{Q \cdot R}$  soft values

Supplement: MOESM2 [file 11898600]
